# Supplementary material for: Carignan Grape Cultivar Salt Tolerance during the Germination Phase across the Mediterranean Basin
Source: MDPI journal article supplement (doi:10.3390/seeds1020012), 2022-05-07
Supplement: s1 [file s1]

## Supplementary material

**Table S1.** Results from Generalized Linear Models (GLMs) used to evaluate the effect of pre-treatments, distance from the sea, years of the vineyards, rootstock type, and temperatures on the Final Germination Percentage (FGP). Results from GLMs used to evaluate the effect of pre-treatments, distance from the sea, and temperatures on the Recovery phase (RP). A log link function and quasibinomial error structure were used for analyzing the FGP and RP. All statistical analyses were carried out using R v. 3.1.3. Significance of p values codes: \*\*\*p < 0.001, \*\*p < 0.01 and \*p < 0.05.

| FGP                      | Estimate  | Std. Error | t value | P (> t )    |
|--------------------------|-----------|------------|---------|-------------|
| Distance                 | 0.3052    | 0.1151     | 2.652   | 0.0083**    |
| Years                    | 0.0004434 | 0.0089949  | 0.049   | 0.961       |
| Rootstock                | -0.2516   | 0.2951     | -0.853  | 0.394       |
| Pre-treatment            | -30.571   | 0.1427     | -21.420 | < 2e-16 *** |
| Temperature              | -0.6109   | 0.2242     | -2.725  | 0.0067 **   |
| Pre-treatment x Distance | 0.30775   | 0.09633    | 3195    | 0.001504 ** |
| RP                       | Estimate  | Std. Error | t value | P (> t )    |
| Distance                 | -0.1726   | 0.1018     | -1695   | 0.0916 .    |
| Pre-treatment            | -238.103  | 0.08545    | -27864  | < 2e-16 *** |
| Temperature              | -0.3778   | 0.1892     | -1997   | 0.0471 *    |
| Years                    | -0.01011  | 0.00706    | -1.432  | 0.154       |
| Rootstock                | -31.250   | 0.1416     | -22.069 | 0.0731 .    |
| Pre-treatment x Distance | -0.17493  | 0.08218    | -2.129  | 0.0344 *    |
